# Supplementary material for: Activation of endothelial cells by extracellular vesicles derived from Mycobacterium tuberculosis infected macrophages or mice
Source: PubMed Central journal article supplement (PMC5979010; doi:10.1371/journal.pone.0198337), 2018-05-31
Supplement: pone.0198337.s001.pdf [file pone.0198337.s001.pdf]

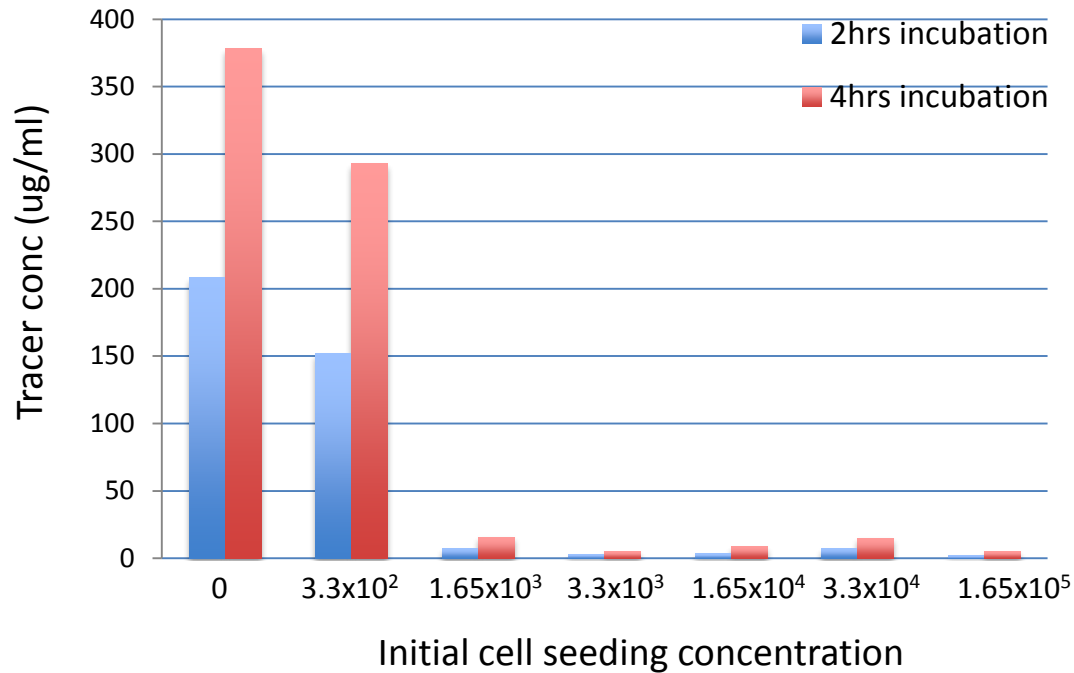

S1 Figure: Evaluating endothelial cell monolayer formation at different cell concentrations. Mouse endothelial cells (SVEC4-10) were seeded at various concentrations into top chamber of a transwell and cultured for 6 days. Rhodamine-B dextran (70kD, 1mg/mL ) was added to the top chamber and incubated for 2 and 4hrs. Media was taken from bottom chamber to determine dye concentration.
