# Supplementary material for: Activation of endothelial cells by extracellular vesicles derived from Mycobacterium tuberculosis infected macrophages or mice
Source: PubMed Central journal article supplement (PMC5979010; doi:10.1371/journal.pone.0198337), 2018-05-31
Supplement: pone.0198337.s002.pdf [file pone.0198337.s002.pdf]

**S1 table:** Primer sequences for Real-time PCR

| Gene          | Primer sequence |                             |
|---------------|-----------------|-----------------------------|
| <i>ccl2</i>   | Forward         | 5' CCTGCTGTTACAGTTGCC 3'    |
|               | Reverse         | 5' ATTGGGATCATCTTGCTGGT 3'  |
| <i>ccl7</i>   | Forward         | 5' TCTGTGCCTGCTGCTCATAG 3'  |
|               | Reverse         | 5' TTCCTCTTGGGGATCTTTTG 3'  |
| <i>cxcl1</i>  | Forward         | 5' CCACACTCAAGAATGGTCGC 3'  |
|               | Reverse         | 5' TCTCCGTTACTTGGGGACAC 3'  |
| <i>cxcl10</i> | Forward         | 5' CTCATCCTGCTGGGTCTGAG 3'  |
|               | Reverse         | 5' CCTATGGCCCTCATTCTCAC 3'  |
| <i>fas</i>    | Forward         | 5' CAGACATGCTGTGGATCTGG 3'  |
|               | Reverse         | 5' CCTCAGCTTTAAACTCTCGGA 3' |
| <i>saa3</i>   | Forward         | 5' TCCATTGCCATCATTCTTTG 3'  |
|               | Reverse         | 5' AGTAGGCTCGCCACATGTCT 3'  |
| <i>tlr2</i>   | Forward         | 5' CATCACCGGTCAGAAAACAA 3'  |
|               | Reverse         | 5' ACCAAGATCCAGAAGAGCCA 3'  |
| <i>vcam1</i>  | Forward         | 5' CCGGCATATACGAGTGTGAA 3'  |
|               | Reverse         | 5' TCGGGCGAAAAATAGTCCTT 3'  |
| <i>dnaja2</i> | Forward         | 5' AGGATTACGTTCACTGGGGA 3'  |
|               | Reverse         | 5' TCCCATCTCTCTGGAACACC 3'  |
| <i>gapdh</i>  | Forward         | 5' TCGTCCCGTAGACAAAATGG 3'  |
|               | Reverse         | 5' TTGAGGTCAATGAAGGGGTC 3'  |
